# Supplementary material
Source: Springer Nature journal article supplement (http://www.springermedizin.de/resource/supplementary/13195_2014_222_MOESM2_ESM.pdf/9688532)
Supplement: MOESM2 [file 9688532]

# Lewy Body Disease

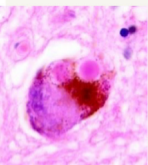

**Parkinson's  
Disease (PD)**

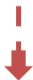

**Mild Cognitive  
Impairment**

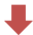

**PD Dementia**

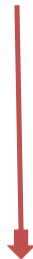

**Dementia with  
Lewy bodies**

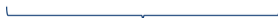

**Lewy Body  
Dementias**

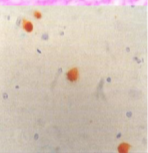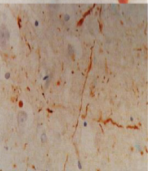

Time
